# Supplementary material for: Deep history of cultural and linguistic evolution among Central African hunter-gatherers
Source: Nat Hum Behav. 2024 May 27;8(7):1263–75. doi: 10.1038/s41562-024-01891-y (PMC11272592; doi:10.1038/s41562-024-01891-y)
Supplement: Supplementary file 5 — Vocabulary items available, list of cognate sets, additional notes on linguistic terminology, criteria used for selecting cognate sets and additional references related to linguistic analyses. [file 41562_2024_1891_MOESM5_ESM.xlsx]

## Sheet: Contents
Table of contents
S1_Words_available	List of all compiled words to designate musical instruments and subsistence tools across CAHG languages
S2_Shared_words	List of shared words between CAHG, notes on geographical distribution of words and objects, and reasoning behind including it them in same cognate sets
S3_References	References consulted for grammatical information on CAHG languages and those of their farming neighbours

## Sheet: S1_Words_available
Trait	Subtype	Name in native language	Group	Reference
Arrow	wooden tip	api	Sua, DRC	Turnbull, 1965
	metal tip	api	Sua, DRC	Turnbull, 1965
	metal tip	apí	Efe, DRC	Bailey, 1992
	metal tip	di.banzika	Bakoya, DRC	Soengas, 2010
		mbadi	Batwa (West), DRC	Kazadi, 1981; Hatz, 2019 (word)
	wooden tip	mbánji	Baka, Cameroon	Sunyol, n.d.; Hatz, 2019 (word)
	metal tip	mbànzà	Aka, CAR	Sunyol, n.d.; Hatz, 2019 (word)
		ubuta	Batwa (Rwanda)	Fauna and Flora International (2013)
Axe		djombi	Aka, CAR	Lewis, 2002
		konga, kopa	Baka, Cameroon	Weig, 2013
		lónzá	Aka, Car	Hatz, 2019
		obon	Bakola/ Bagyeli, Cameroon	Nke, 2014
		soka	Bakoya, DRC	Soengas, 2010
Banging sticks	metal	badunka	Babongo (Awandji-speaking)	Le Bomin, 2012
		bakoko	Babongo (Awandji-speaking)	Le Bomin, 2012
		bekomwa	Batwa (West), DRC	Africa Museum Collection (Tervuren)
		bonkwasa	Batwa (West), DRC	Africa Museum Collection (Tervuren)
		dì.kpàkpà	Aka CAR	Fürniss, 2012
		kono	Babongo (Tsogo-speaking)	Le Bomin, 2012
	tree trunks	màkɛ̄kɛ̄	Baka, Cameroon	Furniss, 2012
	sticks banged by women in nkumbi initiation	makata	Sua, DRC	Turnbull 1965
		mbaka	Babongo (Nzebi-speaking)	Le Bomin, 2012
		a.kesi	Bakoya, DRC	Eppelboin, 2006
		bàpáa	Bakola, Bagyeli, Cameroon	Furniss, 2017
		mitsele	Babongo (Kanighi-speaking)	Le Bomin, 2012
	Clappers - used only in honey season to accompany collection of honey	ngbenbe	Sua, DRC	Turnbull, 1965
Bark beater		kolea	Sua, DRC	Turnbull, 1965
Basket		Ankala	Bakoya, DRC	Soengas, 2010
		kilingo	Aka CAR	Bahuchet, 1992
	Carry stuff on your back	Di.kuya	Bakoya, DRC	Soengas, 2010
	corbeille, elegant basket conical	diapa	Bakoya, DRC	Soengas, 2010
	it can be augmented with an accesorry made of wooden sticks (shown here) called lèndè	íkùà	Aka CAR	Bahuchet, 1992
	Carry game	Likulé	Baka, Cameroon	Duda et al. 2018
	Gathering basket . Open mesh, of strips of dried vine - these are made by the Pygmy women	so	Sua, DRC	Turnbull, 1965
	Filtering one	Tande	Bakoya, DRC	Soengas, 2010
		tètè (another type)	Aka CAR	UNESCO, 2008
		tsəharak	Baka, Cameroon	Weig, 2013
Bells	claperless	bɛ̀ŋgɔ́	Bakola/ Bagyeli, Cameroon	Blench, 2009
	Metal open bells with a suspended crotal for a clapper	kindu/kindi (dep if Tsogo or Nzebi)	Babongo (Awandji-speaking)	Le Bomin, 2012; Iyer, 2019
	Woven rattle bell	litchèké	Babongo (Awandji-speaking)	Le Bomin, 2012
	body	mànzànzè	Aka CAR	Fürniss, 2012
	dog collar	ndibu	Babongo (Awandji-speaking)	Le Bomin, 2012
	Internal swing bells	sàkà	Baka, Cameroon	Bahuchet and Furniss, 1995
	body (different type)	mbòlà	Aka CAR	Fürniss, unpublished
Blowgun		ngadi	Bakoya, DRC	Fa et al. 2016
		sòmbó/ kúkà	Aka, CAR	Bahuchet, 1992
Bow		iguila	Bakoya, DRC	Fa et al. 2016
		imiheto	Batwa (Rwanda)	Fauna and Flora International (2013)
	small - maybe 30-50cm long	mange	Sua, DRC	Turnbull, 1965
	Hunting	ngbángò	Aka CAR	Bahuchet, 1992
		bo.ngango	Batwa, West	Hatz, 2019
		sebá	Efe, DRC	Carpanetto and Germi, 1989; Hatz, 2019 (word)
Castanets		kolokbenje	Sua, DRC	Turnbull, 1965
Clappers		banja	Sua, DRC	Turnbull 1965
Crossbow		gane	Bakoya, DRC	Soengas, 2010
	Special crossbow for apes	debete	Bakoya, DRC	Soengas, 2010
		mbànò	Aka CAR	Bahuchet, 1992
Dam	fishing	bàjà	Baka, Cameroon	Gallois and Duda, 2016; Hatz, 2019 (word)
	fishing	diloke	Bakoya, DRC	Soengas, 2010
Drum		abela	Bakoya, DRC	Eppelboin, 2006
	conical strum, 2 skins	andum	Bakoya, DRC	Eppelboin, 2006
	Cylyndrical wooden drum short one	ténguè	Bakola/ Bagyeli, Cameroon	Fürniss, 2019; Oloa-Biloa, 2011
	Short one. Also cylyndrical and with one pegged skin.	imbungu	Babongo (Nzebi-speaking)	Le Bomin, 2012
	large conical	mbɛ̀	Bakola/ Bagyeli, Cameroon	Blench, 2009
	only men; Cylyndrical wooden drum. BUT not open ended (the bottom is closed). Played with a stick	mgbæ	Bedzan, Cameroon	Marandola, 2014
	Short, goblet anthropomorphic, single skinned	mokiki	Babongo (Tsogo-speaking)	Le Bomin, 2012
	One-skinned, play standing up or sitting on it. Cylindrical wooden drum.	mòkíndá	Baka, Cameroon	Fürniss, 2012
	One-skinned, play standing up or sitting on it. Cylindrical wooden drum	mòkíndá	Aka CAR	Fürniss, 2012
	Cylyndrical wooden drum, nailed skin	mosumba/mousomba (depending on whether Nzebi or Tsogo)	Babongo	Iyer, 2019; Fürniss, 2017
	Conical, two laced skins (watch out as they are normally single-skinned)	ndrungu	Babongo (Awandji-speaking)	Le Bomin, 2012
	two headed drum	ndumu	Aka CAR	Fürniss, unpublished
	two headed conical drum; struck with two sticlks	ndumu	Bakoya, DRC	Soengas, 2010
	Conical, 2 membranes	ndùmù (distinguish between nyɛ́ ɛ̀ ndùmù « mère » (grave) from lɛ̀ ndùmù « enfant » (aigu) (Furniss, 2012)	Baka, Cameroon	Furniss, 2017; Bahuchet, 1992
	2 membranes	ndumu, called ŋgoye when played by women with a stick	Aka, CAR	Oloa-Biloa, 2017
	Conical wooden drum, 2 laced skins	ndungu	Babongo (Nzebi-speaking)	Bahuchet, 2012
	Conical wooden drum, 2 laced skins	ndzungu or ndungu depending if Tsogo or Nzebi	Babongo	Iyer, 2019
	Cylyndrical wooden drum, pegged skin; played with the hands - version of about 1.6m tall (exists also in a slightly smaller size of 1m tall)	ngom	Bakoya, DRC	Soengas, 2010
	single skinned	ngoma	Batwa (Rwanda)	Brandel, 1973
	Conical, two laced skins (watch out as they are normally single-skinned)	ngoma (kakani and kadziri)	Babongo (Teké-speaking)	Le Bomin, 2012
	Also cylyndrical and with one laced (not pegged) skin.	ngomo	Babongo (Kanighi-speaking)	Le Bomin, 2012
	Conical, two laced skins (watch out as they are normally single-skinned)	ngomo, nzungu	Babongo (Tsogo-speaking)	Le Bomin, 2012
	Cylyndrical wooden drum, pegged skin; played with the hands - version that is very short	ngomu, ngom	Bakoya, DRC	Soengas, 2010
	high-pitched drum of drum pairs played alongside mokinda	kúbù	Aka, CAR	Fürniss, 2019
	high-pitched drum of drum pairs played alongside mokinda	kúbù	Baka, Cameroon	Fürniss, 2019
	single skinned, played with 2 hands	mben or ngwin	Bedzan, Cameroon	Fürniss, 2019
	single skinned, played with a stick and with one hand	nkè meku or ngwin ndu	Bedzan, Cameroon	Fürniss, 2019
	small conical	ŋgɔ̀m	Bakola/ Bagyeli, Cameroon	Blench, 2009
	tam tam (goblet drum)	antumu	Bakoya, DRC	Soengas, 2010
	conical drum, single skinned	kuce	Efe, DRC	Fürniss, 2019
Fishing hook		njɛ́ɛ̀njɛ̀	Baka, Cameroon	Gallois and Duda, 2016
Fishing nailon threads		kū nà njɛ́ɛ̀njɛ̀	Baka, Cameroon	Gallois and Duda, 2016
Flute	made of cane, 36.5cm	Baruma	Sua, DRC	Africa Museum Collection (Tervuren)
	simple flute, small	hìndèhú	Aka, CAR	Fürniss and Bahuchet, 1995
	simple flute, played by women	èlēhú, èlēpú	Baka, Cameroon	Fürniss, 2012; Arnaud et al. 2006 (pg. 45)
	simple flute, small	hìndèhú	Aka, CAR	Oloa-Biloa, 2014
	Bamboo - notched	lifulele	Aka, CAR	Oloa-Biloa, 2017
	notched	mòbìó	Baka, Cameroon	Bahuchet and Furniss, 1995
	another simple flute made with papaya leafstalks	móbéké	Aka CAR	Bahuchet and Furniss, 1995
	notched	mòbìó	Aka CAR	Bahuchet and Furniss, 1995
		ruma	Efe, DRC	Demolin, 1993; Turnbull 1965; Schebesta, 1949
		umwirongi	Batwa (East), Burundi	Africa Museum Collection (Tervuren)
Ground harp	instrument traditionnel, temporaire, improvisé au moyen d'un couvercle de tôle, d'une branche arquée et d'un fil de nylon que le jeune garçon centrafricain pince avec ses doigts" (Dournon 1981, p. 52) . le dispositif d'amplification est un trou dans la terre ; la table d'harmonie consiste en une grosse feuille épaisse, une plaque d'écorce ou un vieux couvercle de marmite ; la corde est tendue…	dìgòmbé	Aka CAR	Fürniss and Bahuchet 1995, pp. 90, 105
		g’bendi/ Angbindí	Baka, Cameroon	Billard, 2008
Harp	small	domu	Efe, DRC	Demolin, 1993
	6 strings	inanga	Batwa (Uganda)	Hoffsi, 2008; UNPO, 2011
	5 strings	kùndé, kùndí	Aka CAR	Eppelboin, 1995; Furniss, 2012
	8 strings	mondume	Aka, CAR	Oloa-Biloa, 2017; Fürniss, 2017;2012
		ngombi	Babongo (Nzebi-speaking)	Le Bomin, 2012
		bo.ngombe	Batwa (West), DRC	Hatz, 2019
		ngòmbi	Baka, Cameroon	Devin, 2020
	other type of harp	otchendze	Babongo (Teké-speaking)	Le Bomin and Mbot, 2012
	other type of harp	àìtà	Baka, Cameroon	Fürniss, 2019
	A hand-held, stringed musical instrument similar to a harp; it has a soundbox from which a curved neck protrudes. The strings run from the neck to the body, are tightened with pegs, and are plucked.	Zoma	Efe, DRC	Fisher, 1987
		ngòmbi	Aka CAR	Fürniss, unpublished
Honey container	leaves and vines(temporary one)	apayabisi	Sua, DRC	Turnbull, 1965
	Bark	ebimba	Sua, DRC	Turnbull, 1965
	Bark container for transporting honey back to camp	mòkòbé	Aka CAR	Bahuchet, 1985
	temporary collection basket, made with leaves	nganda	Bakoya, DRC	Soengas, 2010
	Temporary collection basket, made with leaves	pèndi	Baka, Cameroon	Bahuchet, 1992
	Temporary collection basket, made with leaves	pèndí	Aka CAR	Bahuchet, 1985
Horn	horn en invoire avec embouchure laterale et trou de modulation	Apwanga	Sua, DRC	Africa Museum Collection (Tervuren)
	lateral	embulé	Aka CAR	Fürniss, unpublished
		ghebumba	Babongo (Tsogo-speaking)	Le Bomin, 2012
	pumpkin in the end	ineuragame	Batwa (East), Rwanda	Africa Museum Collection (Tervuren)
	long and short version. . La fabrication des horn (horn)s nécessite de grandes bandes d'écorce de trois arbres appelles ingulu, arubese et i/e. Ces bandes d'écorce sont roulées sur elles-mêmes, à la manière d'un cornet de papier. Deux tiges de bois placées latéralement donnent une armature aux instruments. L'embouchure est située à l'extrémité la plus serrée de Péco	mai	Efe, DRC	Demolin, 1993
	Long trumpet the youths carry to hunting camps	toré	Efe, DRC	Turnbull, 1965
	Long trumpet the youths carry to hunting camps	molimo	Sua, DRC	Kenrick, 1999
	wood, slightly curved	lusomba	Sua, DRC	Schebesta, 1952
		ntsiemi	Babongo (Teké-speaking)	Le Bomin, 2012
	lateral	umurangi	Batwa (East), Rwanda	Africa Museum Collection (Tervuren)
		inkanka	Batwa (East), Rwanda	Africa Museum Collection (Tervuren)
		urugunda	Batwa (East), Rwanda	Africa Museum Collection (Tervuren)
	antellope	vungi	Babongo (Nzebi-speaking)	Le Bomin, 2012
Knife		méŋɡel	Baka, Cameroon	Blench, 2009
		pa	Bakoya, DRC	Soengas, 2010
		yobe	Aka, CAR	Lewis, 2002
Lamellaphone		ikembe	Batwa (East), Rwanda	Africa Museum Collection (Tervuren)
		kèmbe	Baka, Cameroon	Fürniss and Bahuchet, 1995
		kembi	Sua, DRC	Turnbull, 1965
		likembe	Efe, DRC	Bailey, 1992
	12 lamellae, all made with wood?	mbé péré	Bedzan, Cameroon	Marandola, 2003
	from eight to fourteen bamboo lamellas and is tuned in either a tetratonic 32 or pentatonic scale. They are attached on one extreme to a bamboo stick.	méndzá	Bedzan, Cameroon	Marandola, personal communication (16th April 2020)
		sanza, sànzé	Aka CAR	Furniss, 2017; Motte, 1980
		sanzi	Babongo (Awandji-speaking)	Le Bomin, 2012
		Tamé-tamé	Bakola/ Bagyeli, Cameroon	Oloa-Biloa, 2011
Leather sac		sàwàlà	Aka CAR	Bahuchet, 1992
		sàwàlà	Baka, Cameroon	Bahuchet, 1992
Machette		fa	Bakola/ Bagyeli, Cameroon	Nke, 2014
	hunting	ngbala, mbono	Baka, Cameroon	Hetz, 2019
		pa	Bakoya, DRC	Soengas, 2010
Machettes banging together	díkétò	Aka CAR	Bahuchet and Furniss, 1995
Musical bow		dongo	Babongo (Kanighi-speaking)	Le Bomin, 2012
	2 stringed	èngbítí	Aka CAR	Fürniss and Bahuchet 1995, pp. 90, 105
	1 string. In some populations only played by women, in Mbendjele played by men.	game	Aka, CAR	Oloa-Biloa, 2014
	2 strings	kittingbi	Efe, DRC	Demolin, 1993; Turnbull 1965; Schebesta, 1949
	2 stringed	língbidi/limbindi	Baka, Cameroon	Fürniss, 2006
		ngindi	Aka CAR	Fürniss, unpublished
		mange	Sua, DRC	Turnbull, 1965
	1 stringed.	mbèlà	Aka CAR	Bahuchet and Furniss, 1995
		mgongo	Babongo	Iyer, 2019
		mogongo	Babongo (Tsogo-speaking)	Le Bomin, 2012
	1 string	mugongo	Babongo (Awandji-speaking)	Le Bomin, 2012
	single stringed	ngàngo	Baka, Cameroon	Bahuchet, 1992
		ngadi	Bakoya, DRC	Soengas, 2010
	one string, harp-like	támìntúbà	Bakola, Bagyeli, Cameroon	Furniss, 2017
		Umuduri	Batwa (east), Burundi	Africa Museum Collection (Tervuren)
Net	Hunting	di.oti	Bakoya, DRC	Hammer, Geller-Grimm, Lerp and Reymann, 2015
	hunting - about 1m tall and anything between 10-150m long	kìà	Aka CAR	Bahuchet, 1992
	fishing	ngúmā,	Baka, Cameroon	Devin, 2020
		kùyó / kùya	Sua, DRC	Turnbull, 1965
Pirogue		ga	Baka, Cameroon	Devin, 2020; Hatz, 2019 (word)
Pluriarc	3 stringed, with some corn grains placed in the sound box (made of bamboo) to embellish the sound	bèntsì	Bedzan, Cameroon	Marandola, 2003
	6 strings	dúm	Bakola/ Bagyeli, Cameroon	Oloa-Biloa, 2011
Rattle	Basket but for ankle	bégèlè	Bakola, Bagyeli, Cameroon	Oloa-Biloa, 2014
	Basket	besa	Babongo (Kanighi-speaking)	Le Bomin, 2012
	normal	bisa	Babongo (Kanighi-speaking)	Le Bomin, 2012
		bisanza	Babongo (Tsogo-speaking)	Le Bomin, 2012
		moséké	Babongo (Tsogo-speaking)	Le Bomin, 2012
	Gourd	djaga	Babongo (Kanighi-speaking)	Le Bomin, 2012
	Double bean seeds	genza	Babongo (Tsogo-speaking)	Le Bomin, 2012
		ijaja	Babongo (Nzebi-speaking)	Le Bomin, 2012
		ikinyuguli	Batwa (East), Rwanda	Africa Museum Collection (Tervuren)
	basket	iyagha	Babongo (Nzebi-speaking)	Le Bomin, 2012
	Basket	lìgbebe	Baka, Cameroon	Bahuchet and Furniss, 1995
	Plant fiber	mangisa , màyoyo or màngota	Baka, Cameroon	Devin, 2020
	Basket	lìgbégbé	Aka CAR	Fürniss, 2012
	Basket	lìgbégbé	Baka, Cameroon	Fürniss and Bahuchet, 1995
	Woven rattle bell	litchèké	Babongo (Awandji-speaking)	Le Bomin and Mbot, 2012
	Basket	li.gbo:gbo	Efe, DRC	Hatz, 2019
		sòkò	Aka CAR	Fürniss, 2012
		sàkà	Baka, Cameroon	Bahuchet and Furniss, 1995
		màngotà	Baka, Cameroon	Bahuchet and Furniss, 1995
	l'arbre ukaka Duboscia macrocarpa Bocq. (Tiliaceae)	ma.soku	Bakoya, DRC	Soengas, 2010
		masoku	Babongo (Awandji-speaking)	Le Bomin, 2012
	body rattles / body bells	mànzànzè	Aka CAR	Fürniss and Bahuchet, 1995
	body rattles / body bells	mbòla	Aka CAR	Fürniss and Bahuchet, 1995
	ankle rattles made with seeds and tied with a string	ashaka	Aka CAR	Le Bomin and Mbot, 2012
	ankle rattles made with seeds and tied with a string	ashaka	Baka, Cameroon	Le Bomin and Mbot, 2012
	Basket	mèndjiéba	Bakola, Bagyeli, Cameroon	Oloa-Biloa, 2014
	Bean seeds	motseji	Babongo (Tsogo-speaking)	Le Bomin, 2012
	Bean seeds	mwarakasa	Babongo (Awandji-speaking)	Le Bomin, 2012
	basket	nkê mèkù	Bedzan, Cameroon	Marandola, 2014, 2003
	basket	nyàs	Bakola/ Bagyeli, Cameroon	Blench, 2009
	basket	soki	Babongo (Tsogo-speaking)	Le Bomin, 2012
	Basket	èzékézé	Aka CAR	Motte, 1980
Small woven bag		ubukocho	Batwa (Rwanda)	Fauna and Flora International (2013)
Snare	Cable, twisted, leg snare	anjassi, mò.lingè	Baka, Cameroon	Duda et al. 2018
	twisted metal cable	apeku.lo	Baka, Cameroon	Duda et al. 2018
	they have both cable snares and vine snares as well as traps where the animals fall into	apokolo	Bakoya, DRC	Soengas, 2010
	cable snare	damatchingo, idiuku	Bakoya, DRC	Soengas, 2010
	no cable snare	nduma and itanga	Bakoya, DRC	Soengas, 2010
		ègbòtògbòtò	Aka CAR	Bahuchet, 1992
		èkpòló	Aka CAR	Bahuchet, 1992
		èténdé	Aka CAR	Bahuchet, 1992
		kúkà	Aka CAR	Bahuchet, 1992
		lékè	Aka, CAR	Bahuchet,1985
	glue snare - attached to vine and used to get birds stuck	mbele	Bakoya, DRC	Soengas, 2010
		mólèké	Aka CAR	Bahuchet, 1992
	they have 19 different types according to Bahuchet, 1992	motambo	Aka, CAR	Chaudhury, 2017
	cable	waya	Bakoya, DRC	Fa et al. 2016
Spear		amacumu	Batwa (Rwanda)	Fauna and Flora International (2013)
		dikono	Bakoya, DRC	Soengas, 2010
		e.kòngá	Sua, DRC	Ichikawa, 1978
	normal one - metal head	ekonga	Sua, DRC	Turnbull, 1965; also in Carpanetto and Germi, 1989
		gongo	Aka, CAR	Riddell (2013); Lewis, 2002
	fire spear	iswakamaboki	Sua, DRC	Turnbull, 1965
	metal head	kongo	Aka CAR	Bahuchet, 1992
	Metal head or wooden tip	Matsindi	Bakola/ Bagyeli, Cameroon	Nke, 2014
	metal	mbenga	Baka, Cameroon	Weig, 2013
		ngongo	Aka, CAR	Lewis, 2021
Struck beam	carré formé par des poutres sur lequel les musiciens frappent avec des bois et où les hommes et femmes dansent	atchita	Bakoya, DRC	Soengas, 2010, Fürniss, 2017
		bake	Babongo (Tsogo-speaking)	Le Bomin, 2012
		baka	Babongo	Le Bomin and Mbot, 2012
	beam struck - names depend on occasion	bèlé	Bakola, Bagyeli, Cameroon	Oloa-Biloa, 2014; Blench, 2009
	beam struck - names depend on occasion	ngyèn	Bakola, Bagyeli, Cameroon	Oloa-Biloa, 2014; Blench, 2009
	beam struck - names depend on occasion	bákà	Bakola, Bagyeli, Cameroon	Oloa-Biloa, 2014; Blench, 2009
	bois, du raphia ou du bambou	mbàndā.	Baka, Cameroon	Furniss, 2012
	Not a struck beam, but 2 big wooden sticks being struck with one another	banza (*)	Sua, DRC	Fürniss, 2012; 2019
	rhythmic sticks for hunting ritual	mbàndá (*)	Aka, CAR	Fürniss and Bahuchet, 1995; Fürniss, 2012; 2019
	other beam struck resembling that looks like the one from Kwele neighbours	kolo	Bakoya, DRC	Fürniss and Bahuchet, 1995
	Also called log drum	mòkóngo	Aka CAR	Fürniss, 2012
	Played with sticks	ekbwakata	Aka, CAR	Oloa-Biloa, 2014
Trap		éléki	Sua, DRC	Carpanetto and Germi, 1989
		kàbélé	Aka, CAR	Bahuchet,1985
		la.lamba	Bakoya, DRC	Fa et al. 2016
		lékè	Aka, CAR	Bahuchet, 1992
		ngombé	Aka, CAR	Bahuchet, 1992
		tòbà	Aka CAR	Bahuchet, 1992
Whistle	wooden, with trou de modulation; 20.7, 2.8	asei	Sua, DRC	Africa Museum Collection (Tervuren)
	bambou whistle	di.beka, di.boka	Babongo (Nzebi-speaking)	Le Bomin, 2012
	bambou whistle	mo.beke, mòbéké	Aka, CAR	Fürniss, 2019
	wood	insengo	Batwa (East), Rwanda	Africa Museum Collection (Tervuren)
	papaya leafstalk	li.beka	Babongo (Awandji-speaking)	Le Bomin, 2012
	one tone, made with bamboo	lìbóusá	Bakola, Bagyeli, Cameroon	Furniss, 2017
	base, le bois de la tige d'une plante (olyra latifolià) dont on se sert pour fabriquer les sifflets. Près des villages, les pygmées fabri- quent ces instruments avec du bambou ou encore avec des tiges de papayer	Luma	Efe, DRC	Demolin, 1993
	notched	namikote	Bakoya, DRC	Soengas, 2010
	blue duiker	obembe	Babongo (Tsogo-speaking)	Le Bomin, 2012
	seed	pho'u	Sua, DRC	Turnbull, 1965
	grains - specific to call monkeys	pole.pole	Aka CAR	Fürniss, unpublished
	grains - specific to call monkeys	polo.polo	Baka, Cameroon	Hatz, 2019
	papaya leafstalk	pungi	Babongo (Awandji-speaking)	Le Bomin, 2012
		segbe	Efe, DRC	Turnbull, 1965
	Earth	vovo	Babongo (Nzebi-speaking)	Le Bomin, 2012
Wooden Auger	sùmà	Aka CAR	Bahuchet, 1976; Dounias, 2001
Xylophone		likoko	Likely Efe	Africa Museum Collection (Tervuren)
		mànjáŋ	Bakola/ Bagyeli, Cameroon	Blench, 2009
Zither harp	Made of raffia (the same as all other known zither harps in ventral africa. Very different to that of the Aka. has an amplifying table of raffia sticks attached to the bridge and its four strings are nowadays made of cable.	bògongo	Baka, Cameroon	Fürniss, 2006
	Only one to have a wooden body and 3 strings made og a single aerial root of a vanilla liana	bògóngó	Aka CAR	Fürniss, 2012; Bahuchet, 1992
	large (much larger than that of Baka)	engue, ng(j)é	Bakoya, DRC	Eppelboin, 2006; Le Bomin and Mbot, 2012
	Made with pumpkin, 5 strings made of metal	mbe kelon	Bedzan, Cameroon	Furniss, 2017; Marandola, 2003;2014
	3 stringed	mongadi	Aka, CAR	Oloa-Biloa, 2014
		ngé	Bakoya, DRC	Eppelboin, 2006
		nubeké	Baka, Cameroon	Le Bomin and Mbot, 2012
Bullroarer	used during the preparation of the elephant hunt	àìmò	Efe, DRC	Demolin, 1993

## Sheet: S2_Shared_words
Trait	Subtype	Name in native language	Group	Glottocode	Reference	Bantu neighbour object present?	Bantu neighbour name(s)	Notes	Reference notes	Relatedness (Y=Yes, U=Likely yes, but unclear due to insufficient evidence)	Conclusion
Arrow	wooden tip	api	Sua, DRC	bila1255	Turnbull, 1965					Y
	metal tip	api	Sua, DRC	bila1255	Turnbull, 1965	Y				Y	In Efe (efee1239), Balese-Obi (lese1243), Balese-Dese-Karo (lese1243), Mvuba (mvub1239) according to Vorbichler (1971), both a and i in the word are low tone. Slight differences in other dialects (Mangbutu, Mamvu-Mungbere, Mamvu-Gombari) have to do with intervocalic voicing. According to Kutsch Lojenga (2003), bila1255 the language spoken by the Sua group where the same api word is present has th…
	metal tip	àpí	Efe, DRC	efee1239	Bailey, 1992	Y	Lese: àpì		Hatz, 2019	Y	In Efe (efee1239), Balese-Obi (lese1243), Balese-Dese-Karo (lese1243), Mvuba (mvub1239) according to Vorbichler (1971), both a and i in the word are low tone. Slight differences in other dialects (Mangbutu, Mamvu-Mungbere, Mamvu-Gombari) have to do with intervocalic voicing. According to Kutsch Lojenga (2003), bila1255 the language spoken by the Sua group where the same api word is present has th…
Arrow		mbadi	Batwa (West), DRC	bush1247	Kazadi, 1981; Hatz, 2019 (word)	N		Cognate between Batwa and Baka	Hatz, 2019	Y	Established cognate between Baka abd Batwa (West) according to Hatz, 2019
	wooden tip	mbánji	Baka, Cameroon	baka1272	Sunyol, n.d.; Hatz, 2019 (word)	N				Y	Established cognate according to Hatz, 2019
Arrow	metal tip	di.banzika	Bakoya, DRC	ngom1270	Soengas, 2010	Y				Y	The ngom1270 entry is likely to consist of a noun class prefix di- and a suffix -ika, which is attested in other words as well (Soengas 2010:135,373). The remaining root is likely the same as the one in the ngan1304 word.
	metal tip	mbànzà	Aka, CAR	ngan1304	Sunyol, n.d.; Hatz, 2019 (word)	Y	Pande: mànzà, Ngbaka: mbanza	Nbgaka have the same word	Hatz, 2019	Y	The ngom1270 entry is likely to consist of a noun class prefix di- and a suffix -ika, which is attested in other words as well (Soengas 2010:135,373). The remaining root is likely the same as the one in the ngan1304 word.
Basket	Carry stuff on your back	Di.kuya	Bakoya, DRC	ngom1270	Soengas, 2010					Y	No further resource is available for ngan1304 that could be useful for understanding the relationship between these two words. However, based on the previous examples either the noun in ngan1304 is in the class of nouns ∅/ba, suggesting that it lacks the prefix of the ngom1270 noun or the noun was simply omitted in transcription in the Bahuchet (1992) ethnographical description. The difference be…
	it can be augmented with an accesorry made of wooden sticks (shown here) called lèndè	íkùà	Aka CAR	ngan1304	Bahuchet, 1992		N	word specific to Aka language	Hatz, 2019	Y	No further resource is available for ngan1304 that could be useful for understanding the relationship between these two words. However, based on the previous examples either the noun in ngan1304 is in the class of nouns ∅/ba, suggesting that it lacks the prefix of the ngom1270 noun or the noun was simply omitted in transcription in the Bahuchet (1992) ethnographical description. The difference be…
Bow	Hunting	ngbángò	Aka CAR	ngan1304	Bahuchet, 1992	Y	Ngbaka: nbgbangò (general word for bow)		Hatz, 2019	U	The entry bongango is attested for bush1247 by Bahuchet (1992) with bo- likely to be the class 3 prefix (Hulstaert, 1999). The difference to ngbángò in ngan1304 is not explained although prenasalised labiovelar stops are known to occasionally alternate with plain labiovelars in Bantu. While borrowing or shared origin is possible, perhaps even likely, we cannot rule out that the form are accidenta…
		bo.ngango	Batwa, West	bush1247	Hatz, 2019	Y		NOTE: The Baka use the word ngángò to call a musical bow played by men. The Ngbaka (ubangian speaking) neighbours of the Aka use the word nbgbangò to denote an arc in general.	Hatz, 2019	U	The entry bongango is attested for bush1247 by Bahuchet (1992) with bo- likely to be the class 3 prefix (Hulstaert, 1999). The difference to ngbángò in ngan1304 is not explained although prenasalised labiovelar stops are known to occasionally alternate with plain labiovelars in Bantu. While borrowing or shared origin is possible, perhaps even likely, we cannot rule out that the form are accidenta…
Drum	large conical	mbɛ̀	Bakola/ Bagyeli, Cameroon	gyel1242	Blench, 2009	Y		Some Cameroonian populations have different versions of a conical drum but they are pegged rather than laced and not resemble the Bakola's drum. Name is also not the same: madan (Mbum people). Bakola's drum is exactly the same morphologically as that of Baka. Kwasio people do call it Mbe	Blench, 2009; Fürniss, 2019	Y	The vowels in mbɛ̀ and mgbæ are very likely to be the same because gyel1242 lacks an /ɛ/:/æ/ opposition. The tone difference is likely to reflect the fact that Marandola (2014) doesn’t use low tone marks in their transcription. The (prenasalized) labiovelar in tika1246 is likely to correspond to a (prenasalized) bilabial in gyel1242 where labiovelars appear to be lost in other cases as well and a…
	only men; Cylyndrical wooden drum. BUT not open ended (the bottom is closed). Played with a stick	mgbæ	Bedzan, Cameroon	tika1246	Marandola, 2014	Y	Y	The Tikar have a similar drum but they play it with sticks rather than with hands.	Marandola, 2003	Y	The vowels in mbɛ̀ and mgbæ are very likely to be the same because gyel1242 lacks an /ɛ/:/æ/ opposition. The tone difference is likely to reflect the fact that Marandola (2014) doesn’t use low tone marks in their transcription. The (prenasalized) labiovelar in tika1246 is likely to correspond to a (prenasalized) bilabial in gyel1242 where labiovelars appear to be lost in other cases as well and a…
Drum	One-skinned, play standing up or sitting on it. Cylindrical wooden drum.	mòkíndá	Baka, Cameroon	baka1272	Fürniss, 2012	N		Not present in neither bantu neighbours of Aka (Ngando) or ubangian neighbours (Ngbaka, Gbaya, Banda) of Baka. The word is also unique to Aka and Baka.	Fürniss and Bahuchet, 1995	Y	Identical words
	One-skinned, play standing up or sitting on it. Cylindrical wooden drum	mòkíndá	Aka CAR	ngan1304	Fürniss, 2012	N		Not present in neither bantu neighbours of Aka (Ngando) or ubangian neighbours (Ngbaka, Gbaya, Banda) of Baka. The word is also unique to Aka and Baka.	Fürniss and Bahuchet, 1995	Y	Identical words
Drum	two headed drum	ndumu	Aka CAR	ngan1304	Fürniss, unpublished	Y	Ngando: ndumu	Present only in Bantu neighbours of Aka (Ngando) and ubangian neighbours (Ngbaka) of Baka currenrly in conract with them (and not in Bantu/Ubangian groups not in contact with CAHG).The instrument is thought to be original from Aka and Baka but the word is the generic Baka word for "drum". Ngbaka and Ngando use the same word.	Fürniss and Bahuchet, 1995	Y
	two headed conical drum; struck with two sticlks	ndumu	Bakoya, DRC	ngom1270	Soengas, 2010			Present only in Bantu neighbours of Aka (Ngando) and ubangian neighbours (Ngbaka) of Baka currenrly in conract with them (and not in Bantu/Ubangian groups not in contact with CAHG).The instrument is thought to be specific to Aka and Baka but the word is the generic Baka word for "drum". Other Ubangian and Bantu speakers use a similar word.	Fürniss and Bahuchet, 1995	Y
	Conical, 2 membranes	ndùmù (distinguish between nyɛ́ ɛ̀ ndùmù « mère » (grave) from lɛ̀ ndùmù « enfant » (aigu) (Furniss, 2012)	Baka, Cameroon	baka1272	Furniss, 2017; Bahuchet, 1992	Y	Ngbaka: ndumu	Present only in Bantu neighbours of Aka (Ngando) and ubangian neighbours (Ngbaka) of Baka currenrly in conract with them (and not in Bantu/Ubangian groups not in contact with CAHG).The instrument is thought to be specific to Aka and Baka but the word is the generic Baka word for "drum". Other Ubangian and Bantu speakers use a similar word.	Fürniss and Bahuchet, 1995	Y
Drum	high-pitched drum of drum pairs played alongside mokinda	kúbù	Aka, CAR	ngan1304	Fürniss, 2019	N		Both instrument and term unique to Aka and Baka, played in the exact same way	Fürniss, 2019	Y	Identical words
	high-pitched drum of drum pairs played alongside mokinda	kúbù	Baka, Cameroon	baka1272	Fürniss, 2019	N		Both instrument and term unique to Aka and Baka, played in the exact same way	Fürniss, 2019	Y	Identical words
Drum	Cylyndrical wooden drum, pegged skin; played with the hands - version of about 1.6m tall (exists also in a slightly smaller size of 1m tall)	ngom	Bakoya, DRC	ngom1270	Soengas, 2010	?	Y (ngoma = generic word for drum in many Bantu languages)	Common across Central Africa - but CAHG ones are said to have specific organological properties	Le Bomin and Mbot, 2012	Y	All entries most likely the same.
	single skinned	ngoma	Batwa (Rwanda)	kiny1244	Brandel, 1973	?	Y (ngoma = generic word for drum in many Bantu languages)	Common across Central Africa - but CAHG ones are said to have specific organological properties	Le Bomin and Mbot, 2012	Y	All entries most likely the same.
	Conical, two laced skins (watch out as they are normally single-skinned)	ngoma (kakani and kadziri)	Babongo (Teké-speaking)	ibal1241	Le Bomin, 2012	?	Y (ngoma = generic word for drum in many Bantu languages)	Common across Central Africa - but CAHG ones are said to have specific organological properties	Le Bomin and Mbot, 2012	Y	All entries most likely the same.
	Also cylyndrical and with one laced (not pegged) skin.	ngomo	Babongo (Kanighi-speaking)	kani1279	Le Bomin, 2012	?	Y (ngoma = generic word for drum in many Bantu languages)	Common across Central Africa - but CAHG ones are said to have specific organological properties	Le Bomin and Mbot, 2012	Y	All entries most likely the same.
	Conical, two laced skins (watch out as they are normally single-skinned)	ngomo, nzungu	Babongo (Tsogo-speaking)	tsog1243	Le Bomin, 2012	?	Y (ngoma = generic word for drum in many Bantu languages)	Common across Central Africa - but CAHG ones are said to have specific organological properties	Le Bomin and Mbot, 2012	Y	All entries most likely the same.
	Cylyndrical wooden drum, pegged skin; played with the hands - version that is very short	ngomu, ngom	Bakoya, DRC	ngom1270	Soengas, 2010	N	Y (ngoma = generic word for drum in many Bantu languages)	Organological characteristics are specific to CAHG and no neighbours of Bakoya share name	Le Bomin and Mbot, 2012	Y	All entries most likely the same.
	small conical	ŋgɔ̀m, ngom	Bakola/ Bagyeli, Cameroon	gyel1242	Blench, 2009		Y (ngoma = generic word for drum in many Bantu languages)			Y	All entries most likely the same.
Flute	simple flute, small	hìndèhú	Aka, CAR	ngan1304	Fürniss and Bahuchet, 1995	N		Not present in neither bantu neighbours of Aka (Ngando) or ubangian neighbours (Ngbaka, Gbaya, Banda) of Baka. Word also unique to Aka and Baka.	Fürniss and Bahuchet, 1995; Fürniss, 2019	Y	Word thought to have common origin
	simple flute, played by women	èlēhú, èlēpú	Baka, Cameroon	baka1272	Fürniss, 2012; Arnaud et al. 2006 (pg. 45)	N		In Cameroon, this instrument is informally known as "pygmy flute", pointing to its CAHG origins. Word argued to be of common origin with that from aka - also unique to those 2 groups	Fürniss, 2012; Arnaud et al. 2006 (pg. 45); Fürniss, 2019	Y	Word thought to have common origin
Flute	notched	mòbìó	Baka, Cameroon	baka1272	Bahuchet and Furniss, 1995	N		Not present in neither bantu neighbours of Aka (Ngando) or ubangian neighbours (Ngbaka, Gbaya, Banda) of Baka	Fürniss and Bahuchet, 1995	Y	Identical words
	notched	mòbìó	Aka CAR	ngan1304	Bahuchet and Furniss, 1995	N		Not present in neither bantu neighbours of Aka (Ngando) or ubangian neighbours (Ngbaka, Gbaya, Banda) of Baka	Fürniss and Bahuchet, 1995	Y	Identical words
Flute	made of cane, 36.5cm	Baruma	Sua, DRC	bila1255	Africa Museum Collection (Tervuren)	Y	N	Widespread distribution in Ituri region & wider Central Africa. Name unique to CAHG	Turnbull, 1965	Y	If we consider the prefix difference between bila1255 and efee1239 (baruma / ruma) bila1255 seems to go against the description of the animate/inanimate distinction in Kutsch Lojenga’s (2003) grammar which states that inanimate objects only have one form. However it is highly likely that the wordlist specifically left out the prefixes in efee1239 so the words are most likely the same.
		ruma	Efe, DRC	efee1239	Demolin, 1993; Turnbull 1965; Schebesta, 1949	Y	N	Widespread distribution in Ituri region & wider Central Africa (Bira have it). Name unique to CAHG	Turnbull, 1965	Y	If we consider the prefix difference between bila1255 and efee1239 (baruma / ruma) bila1255 seems to go against the description of the animate/inanimate distinction in Kutsch Lojenga’s (2003) grammar which states that inanimate objects only have one form. However it is highly likely that the wordlist specifically left out the prefixes in efee1239 so the words are most likely the same.
Harp		ngombi	Babongo (Nzebi-speaking)	njeb1242	Le Bomin, 2012	N		This harp is CAHG specific	Le Bomin and Mbot, 2012	Y	The gombi/gombe roots are probably shared once differences in noun class prefixes are taken into account.
		bo.ngombe	Batwa (West), DRC	bush1247	Hatz, 2019	N		word used generally for zither - same cognate as the .gombé ground harp from the Aka but also of the ngombi general word for harp	Hatz, 2019	Y	The gombi/gombe roots are probably shared once differences in noun class prefixes are taken into account.
		ngòmbi	Baka, Cameroon	baka1272	Devin, 2020	N		Not present in neither bantu neighbours of Aka (Ngando) or ubangian neighbours (Ngbaka, Gbaya, Banda) of Baka. The Ngando have a sort of harp with 3 strins and the Ngbaka one of 10 strings but have different origins to that of the Aka. The Ngbaka call their harp Ngombi as well as the Fang. Maybe word is ancient word for harp.	Fürniss and Bahuchet, 1995; Thomas, 1970; Royal Museum of Art and history of Gabon	Y	The gombi/gombe roots are probably shared once differences in noun class prefixes are taken into account.
		ngòmbi, ngɔ̀ mbī	Aka CAR	ngan1304	Fürniss, unpublished	N		Not present in neither bantu neighbours of Aka (Ngando) or ubangian neighbours (Ngbaka, Gbaya, Banda) of Baka. The Ngando have a sort of harp with 3 strins and the Ngbaka one of 10 strings but have different origins to that of the Aka. The Ngbaka call their harp Ngombi as well	Fürniss and Bahuchet, 1995	Y	The gombi/gombe roots are probably shared once differences in noun class prefixes are taken into account.
Honey container	Temporary collection basket, made with leaves	pèndi	Baka, Cameroon	baka1272	Bahuchet, 1992	N	Ngbaka: generic word for container	The container is specific to Aka and Baka. The Ngbaka have a similar word to genote a generic hooded basket, similarly the Ngando use it to call baskets.	Hatz, 2019	Y	Identical words
	Temporary collection basket, made with leaves	pèndí	Aka CAR	ngan1304	Bahuchet, 1985	N	Ngando: generic word for basket	the container is specific to Aka and Baka. The Ngbaka have a similar word to genote a generic hooded basket, similarly the Ngando use it to call baskets.	Hatz, 2019	Y	Identical words
Lamellaphone		ikembe	Batwa (East), Rwanda		Africa Museum Collection (Tervuren)	Y	Y	Widespread distribution across Central Africa	Schebesta, 1941; Demolin, 1993	Y	The addition of the li- prefix in efee1239 probably shows that the word belongs to the Bantu class 5 / 6 li- / ma-). In the other languages it is likely that the prefix was not transcribed;the words seem to share the common root kembe or kembi.
		kèmbe	Baka, Cameroon	baka1272	Fürniss and Bahuchet, 1995	Y	Y	Widespread distribution across Central Africa	Bahuchet & Fürniss, 1995	Y	The addition of the li- prefix in efee1239 probably shows that the word belongs to the Bantu class 5 / 6 li- / ma-). In the other languages it is likely that the prefix was not transcribed;the words seem to share the common root kembe or kembi.
		kembi	Sua, DRC	bila1255	Turnbull, 1965	Y	Y	Widespread distribution across Central Africa	Schebesta, 1941; Demolin, 1993	Y	The addition of the li- prefix in efee1239 probably shows that the word belongs to the Bantu class 5 / 6 li- / ma-). In the other languages it is likely that the prefix was not transcribed;the words seem to share the common root kembe or kembi.
		likembe	Efe, DRC	efee1239	Bailey, 1992	Y	Y	Widespread distribution across Central Africa. Bira neighbours also use the word lì.kembe.	Schebesta, 1941; Demolin, 1993; Hatz, 2019	Y	The addition of the li- prefix in efee1239 probably shows that the word belongs to the Bantu class 5 / 6 li- / ma-). In the other languages it is likely that the prefix was not transcribed;the words seem to share the common root kembe or kembi.
Lamellaphone		sanza, sànzé	Aka CAR	ngan1304	Furniss, 2017; Motte, 1980	Y	Y	Widespread distribution across Central Africa	Bahuchet & Fürniss, 1995	Y	Likely shared
		sanzi	Babongo (Awandji-speaking)	njeb1242	Le Bomin, 2012	Y	Y			Y	Likely shared
Leather sac		sàwàlà	Aka CAR	ngan1304	Bahuchet, 1992	N				Y	Identical words
		sàwàlà	Baka, Cameroon	baka1272	Bahuchet, 1992	N				Y	Identical words
Musical bow	2 stringed	èngbítí	Aka CAR	ngan1304	Fürniss and Bahuchet 1995, pp. 90, 105	N		Not present in neither bantu neighbours of Aka (Ngando) or ubangian neighbours (Ngbaka, Gbaya, Banda) of Baka.	Fürniss and Bahuchet, 1995	Y	Common root with Baka word, same origins as Efe words
	2 strings	kittingbi	Efe, DRC	efee1239	Demolin, 1993; Turnbull 1965; Schebesta, 1949	N		Speficic to CAHG - defining musical feature of CAHG. Thought to have the same origin as that from aka and baka - played in the exact same way by females	Fürniss, 2019; Dehoux and Guillaume, 1995; Demolin and Bahuchet, 1991	Y	Same origins as Aka and Baka words
	2 stringed	língbidi/limbindi	Baka, Cameroon	baka1272	Fürniss, 2006	N		Not present in neither bantu neighbours of Aka (Ngando) or ubangian neighbours (Ngbaka, Gbaya, Banda) of Baka.	Fürniss and Bahuchet, 1995	Y	Common root with Aka word, same origins as Efe words
Musical bow	1 string	mgongo	Babongo (Tsogo-speaking)	tsog1243	Iyer, 2019					Y	gongo seems to be shared and it is likely that the baka1272 form reprents an assimilated notation (ng instead of mg). The difference in the vowel is unexplained, however, leaving the case unclear.
	1 string	mogongo	Babongo (Tsogo-speaking)	tsog1243	Le Bomin, 2012					Y	gongo seems to be shared and it is likely that the baka1272 form reprents an assimilated notation (ng instead of mg). The difference in the vowel is unexplained, however, leaving the case unclear.
	1 string	mugongo	Babongo (Awandji-speaking)	njeb1242	Le Bomin, 2012					Y	gongo seems to be shared and it is likely that the baka1272 form reprents an assimilated notation (ng instead of mg). The difference in the vowel is unexplained, however, leaving the case unclear.
	single stringed	ngàngo	Baka, Cameroon	baka1272	Bahuchet, 1992	Y	Ngbaka neighbours use mbela which is the Aka term for it. Agree on fact that instrument is CAHG original. Batwa (West) use the same word to call a bow in general	Present in both bantu neighbours of Aka (Ngando) and ubangian neighbours (Ngbaka) of Baka, but this is thought to be relatively recent as both Bantus and CAHG agree on a legend attributing its origins to the hunter-gatherers. The Ngbaka use the Aka term for it	Fürniss and Bahuchet, 1995; Arom and Thomas, 1974	U	gongo seems to be shared and it is likely that the baka1272 form reprents an assimilated notation (ng instead of mg). The difference in the vowel is unexplained, however, leaving the case unclear.
Musical bow		ngindi	Aka CAR	ngan1304	Fürniss, unpublished	N				U	The differences cannot be explained since prenasalization is phonemic.
		ngadi	Bakoya, DRC	ngom1270	Soengas, 2010					U	The differences cannot be explained since prenasalization is phonemic.
Rattle	Basket	besa	Babongo (Kanighi-speaking)	kani1279	Le Bomin, 2012			Common across Central Africa	Le Bomin and Mbot, 2012	Y	besa and bisa are probably related since the difference is only in the vowel alternation but the word in baka1272 ( mangisa , màyoyo or màngota) and its varieties seem divergent or at least cannot easily be proved to be related without evidence.
	normal	bisa	Babongo (Kanighi-speaking)	kani1279	Le Bomin, 2012					Y	besa and bisa are probably related since the difference is only in the vowel alternation but the word in baka1272 ( mangisa , màyoyo or màngota) and its varieties seem divergent or at least cannot easily be proved to be related without evidence.
	Plant fiber	mangisa , màyoyo or màngota	Baka, Cameroon	baka1272	Devin, 2020					U	besa and bisa are probably related since the difference is only in the vowel alternation but the word in baka1272 ( mangisa , màyoyo or màngota) and its varieties seem divergent or at least cannot easily be proved to be related without evidence.
Rattle	Basket	lìgbégbé	Aka CAR	ngan1304	Fürniss, 2012	Y	N	Present in both bantu neighbours of Aka (Ngando) and ubangian neighbours (Ngbaka) of Baka, but origins unclear	Fürniss and Bahuchet, 1995	Y	The ngan1304 and baka1272 words (lìgbégbé) are identical and efee1239 seems a likely variant. The It is unclear whether the word in njeb1242 (litchèké) is shared as well. Since njeb1242 lacks labiovelars, the form might reflect developments away from historical labiovelars (delabialization, devoicing and, in one case, fronting)
	Basket	lìgbebe	Baka, Cameroon	baka1272	Bahuchet and Furniss, 1995	Y	Ngbaka: fā gbògbò	Present in both bantu neighbours of Aka (Ngando) and ubangian neighbours (Ngbaka) of Baka, but origins unclear	Fürniss and Bahuchet, 1995	Y	The ngan1304 and baka1272 words (lìgbégbé) are identical and efee1239 seems a likely variant. The It is unclear whether the word in njeb1242 (litchèké) is shared as well. Since njeb1242 lacks labiovelars, the form might reflect developments away from historical labiovelars (delabialization, devoicing and, in one case, fronting)
	Basket	lìgbégbé	Baka, Cameroon	baka1272	Fürniss and Bahuchet, 1995	Y	Ngbaka: fā gbògbò	Present in both bantu neighbours of Aka (Ngando) and ubangian neighbours (Ngbaka) of Baka, but origins unclear. Word is unique to Aka and Baka (and potentially efe), Closest word for rattle is that of Ngbaka neighbors of aka = "fā gbògbò"	Fürniss and Bahuchet, 1995	Y	The ngan1304 and baka1272 words (lìgbégbé) are identical and efee1239 seems a likely variant. The It is unclear whether the word in njeb1242 (litchèké) is shared as well. Since njeb1242 lacks labiovelars, the form might reflect developments away from historical labiovelars (delabialization, devoicing and, in one case, fronting)
	Basket	litchèké	Babongo (Awandji-speaking)	njeb1242	Le Bomin, 2012					U	The ngan1304 and baka1272 words (lìgbégbé) are identical and efee1239 seems a likely variant. The It is unclear whether the word in njeb1242 (litchèké) is shared as well. Since njeb1242 lacks labiovelars, the form might reflect developments away from historical labiovelars (delabialization, devoicing and, in one case, fronting)
	Basket	li.gbo:gbo	Efe, DRC	efee1239	Hatz, 2019					Y	The ngan1304 and baka1272 words (lìgbégbé) are identical and efee1239 seems a likely variant. The It is unclear whether the word in njeb1242 (litchèké) is shared as well. Since njeb1242 lacks labiovelars, the form might reflect developments away from historical labiovelars (delabialization, devoicing and, in one case, fronting)
Rattle	ankle rattles made with seeds and tied with a string	ashaka	Aka CAR	ngan1304	Le Bomin and Mbot, 2012	N		Unique to Aka and Baka	Le Bomin and Mbot, 2012	Y	Identical words
	ankle rattles made with seeds and tied with a string	ashaka	Baka, Cameroon	baka1272	Le Bomin and Mbot, 2012	N		Unique to Aka and Baka	Le Bomin and Mbot, 2012	Y	Identical words
Rattle	basket	sòkò	Aka CAR	ngan1304	Fürniss, 2012	Y	sàkà: word in many bantu languages for "shaking"	Present in both bantu neighbours of Aka (Ngando) and ubangian neighbours (Ngbaka) of Baka, but origins unclear	Fürniss and Bahuchet, 1995; Huttar, 1985	Y	The variants of the word seem to be consistent with changes we have observed so far with regards to vowel alternation. The ngan1304, baka1272 and njeb1242 / tsog1243 words have been most likely transcribed without their noun class prefixes.
	basket	sàkà	Baka, Cameroon	baka1272	Bahuchet and Furniss, 1995	Y	sàkà: word in many bantu languages for "shaking"	Present in both bantu neighbours of Aka (Ngando) and ubangian neighbours (Ngbaka) of Baka, but origins unclear - they are thought to be ancient (therefore likely to have a CAHG origin)	Fürniss and Bahuchet, 1995; Huttar, 1985	Y	The variants of the word seem to be consistent with changes we have observed so far with regards to vowel alternation. The ngan1304, baka1272 and njeb1242 / tsog1243 words have been most likely transcribed without their noun class prefixes.
	l'arbre ukaka Duboscia macrocarpa Bocq. (Tiliaceae)	ma.soku	Bakoya, DRC	ngom1270	Soengas, 2010					Y	The variants of the word seem to be consistent with changes we have observed so far with regards to vowel alternation. The ngan1304, baka1272 and njeb1242 / tsog1243 words have been most likely transcribed without their noun class prefixes.
		moséké	Babongo (Tsogo-speaking)	tsog1243	Le Bomin, 2012					Y	The variants of the word seem to be consistent with changes we have observed so far with regards to vowel alternation. The ngan1304, baka1272 and njeb1242 / tsog1243 words have been most likely transcribed without their noun class prefixes.
		masoku	Babongo (Awandji-speaking)	njeb1242	Le Bomin, 2012					Y	The variants of the word seem to be consistent with changes we have observed so far with regards to vowel alternation. The ngan1304, baka1272 and njeb1242 / tsog1243 words have been most likely transcribed without their noun class prefixes.
	basket	soki	Babongo (Tsogo-speaking)	tsog1243	Le Bomin, 2012	Y	sàkà: word in many bantu languages for "shaking"	Common across Central Africa	Le Bomin and Mbot, 2012	Y	The variants of the word seem to be consistent with changes we have observed so far with regards to vowel alternation. The ngan1304, baka1272 and njeb1242 / tsog1243 words have been most likely transcribed without their noun class prefixes.
Snare	twisted metal cable	apeku.lo	Baka, Cameroon	baka1272	Duda et al. 2018	N				Y	The words are most likely related, the only difference is similar vowel alternations as observed before.
	they have both cable snares and vine snares as well as traps where the animals fall into	apokolo	Bakoya, DRC	ngom1270	Soengas, 2010	N				Y	The words are most likely related, the only difference is similar vowel alternations as observed before.
Spear		dikono	Bakoya, DRC	ngom1270	Soengas, 2010	Y				U	Once class prefixes are taken into account, the roots kongo and konga seem clearly shared. The ngom1270 form kono is unclear since the /n/:/ng/ is phonemic.
		e.kòngá	Sua, DRC	bila1255	Ichikawa, 1978	Y				Y	Once class prefixes are taken into account, the roots kongo and konga seem clearly shared. The ngom1270 form kono is unclear since the /n/:/ng/ is phonemic.
	normal one - metal head	ekonga	Sua, DRC	bila1255	Turnbull, 1965; also in Carpanetto and Germi, 1989	Y	Kongo: ekonga	There's another one that is pygmy-specific for hunting elephants, but not this one		Y	Once class prefixes are taken into account, the roots kongo and konga seem clearly shared. The ngom1270 form kono is unclear since the /n/:/ng/ is phonemic.
	metal head	kongo	Aka CAR	ngan1304	Bahuchet, 1992	Y				Y	Once class prefixes are taken into account, the roots kongo and konga seem clearly shared. The ngom1270 form kono is unclear since the /n/:/ng/ is phonemic.
Struck beam		bake	Babongo (Tsogo-speaking)	tsog1243	Le Bomin, 2012	N		Not present in neighbours (neither instrument nor word). Thought to be a CAHG instrument. Name thought to have the same origin as that from Bakola.	Fürniss, 2019; Le Bomin and Mbot, 2012	Y	Probably related as the difference only lies in vowel alternations.
	beam struck - names depend on occasion	bákà	Bakola, Bagyeli, Cameroon	gyel1242	Oloa-Biloa, 2014; Blench, 2009	N		Not present in neighbours (neither instrument nor word). Thought to be a CAHG instrument. Name thought to have the same origin as that from Babongo.	Blench, 2009	Y	Probably related as the difference only lies in vowel alternations.
Rhythmic sticks	bois, du raphia ou du bambou	mbàndā	Baka, Cameroon	baka1272	Furniss, 2012	N		Not present in neither bantu neighbours of Aka (Ngando) or ubangian neighbours (Ngbaka, Gbaya, Banda) of Baka. The Baka consider it the instrument of the forest, and it is original to them	Fürniss and Bahuchet, 1995; Fürniss, 2012; 2019	Y	The baka1272 and ngan1304 words seem shared. The relationship to the bila1255 is thought to be the same, especially given the exclusive use of the instrument in elephant hunt context.
	2 big wooden sticks being struck with one another	banza	Sua, DRC	bila1255	Fürniss, 2012; 2019	N		Unlike the struck beam where one larger log is struck with smaller sticks, these are similar to the "banging sticks" above. However, both are percussive insturments, so word could have the same origin, for "wooden instrument consisting of 2 stiucks hitting one another". They are (like the Baka mbanda) only used in the forest, by the CAHG and associated with elephant hunts.	Fürniss, 2012; 2019; Turnbull et Chapman, 1992	Y	The baka1272 and ngan1304 words seem shared. The relationship to the bila1255 is thought to be the same, especially given the exclusive use of the instrument in elephant hunt context.
	rhythmic sticks for hunting ritual	mbàndá	Aka, CAR	ngan1304	Fürniss and Bahuchet, 1995; Fürniss, 2012; 2019	N		Unlike the struck beam where one larger log is struck with smaller sticks, these are similar to the "banging sticks" above. However, both are percussive insturments, so word could have the same origin, for "wooden instrument consisting of 2 stiucks hitting one another". They are (like the Baka mbanda) only used in the forest, by the CAHG and associated with elephant hunts.	Fürniss and Bahuchet, 1995; Fürniss, 2012; 2019	Y	The baka1272 and ngan1304 words seem shared. The relationship to the bila1255 is thought to be the same, especially given the exclusive use of the instrument in elephant hunt context.
Trap		éléki	Sua, DRC	bila1255	Carpanetto and Germi, 1989		N	It is a cognate with aka word for trap	Hatz, 2019	Y	A prefix e- with various tones is attested with inanimate nouns in bila1255 (Kutsch Lojenga 2003), so the root léki~lékè is likely shared.
		lékè	Aka, CAR	ngan1304	Bahuchet, 1992		N	It is a cognate with Sua word for trap. Only present in CAHG groups.	Hatz, 2019	Y	A prefix e- with various tones is attested with inanimate nouns in bila1255 (Kutsch Lojenga 2003), so the root léki~lékè is likely shared.
Whistle	bambou whistle	di.beka, di.boka	Babongo (Nzebi-speaking)	njeb1242	Le Bomin, 2012	N		Unique to CAHG, same term as mo.beke from Aka according to Le Bomin and Mbot (2012)	Le Bomin and Mbot, 2012	Y	The differences are probably just related to vowel alternations (njeb1242: beka - boka ngan1304: beke) and different prefix classes (di-; mo-; li-). Otherwise the words seem to share the root.
	bambou whistle	mo.beke, mòbéké	Aka, CAR	ngan1304	Fürniss, 2019	N		Common origin with the one from the Babongo. It is used by the CAHG when men come back from a good hunt	Bahuchet, 1993; Fürniss, 2019	Y	The differences are probably just related to vowel alternations (njeb1242: beka - boka ngan1304: beke) and different prefix classes (di-; mo-; li-). Otherwise the words seem to share the root.
	papaya leafstalk	li.beka	Babongo (Awandji-speaking)	njeb1242	Le Bomin, 2012	N		Unique to CAHG	Le Bomin and Mbot, 2012	Y	The differences are probably just related to vowel alternations (njeb1242: beka - boka ngan1304: beke) and different prefix classes (di-; mo-; li-). Otherwise the words seem to share the root.
Whistle	grains - specific to call monkeys	pole.pole	Aka CAR	ngan1304	Fürniss, unpublished	N		Whistle specific to Baka and Aka. Not present in neighbours	Hatz, 2019	Y	Both versions probably use reduplication as a plural marker (Bertille 2017:117). The differences observed are consistent with the usual vowel alternations previously encountered.
	grains - specific to call monkeys	polo.polo	Baka, Cameroon	baka1272	Hatz, 2019	N		Whistle specific to Baka and Aka. Not present in neighbours	Hatz, 2019	Y	Both versions probably use reduplication as a plural marker (Bertille 2017:117). The differences observed are consistent with the usual vowel alternations previously encountered.
Zither harp	Made of raffia (the same as all other known zither harps in ventral africa. Very different to that of the Aka. has an amplifying table of raffia sticks attached to the bridge and its four strings are nowadays made of cable.	bògongo	Baka, Cameroon	baka1272	Fürniss, 2006	N		Not present in neither bantu neighbours of Aka (Ngando) or ubangian neighbours (Ngbaka, Gbaya, Banda) of Baka. Used in the same way by women when men go hunting to evoke the sexual desire of the man who has gone in an expedition. It appears in Baka mythology as the musical instrument par excelence.	Fürniss and Bahuchet, 1995; Furniss, 2012	Y	Identical words
	Only one to have a wooden body and 3 strings made og a single aerial root of a vanilla liana	bògóngó	Aka CAR	ngan1304	Fürniss, 2012; Bahuchet, 1992	N		Not present in neither bantu neighbours of Aka (Ngando) or ubangian neighbours (Ngbaka, Gbaya, Banda) of Baka	Fürniss and Bahuchet, 1995; Thomas 2008	Y	Identical words

## Sheet: S3_References
Group	Language name	Glottocode	Reference for grammar consulted
Aka CAR	Ngando (ngd)	ngan1304	Bouquiaux, Luc and Thomas, Jacqueline Mauricette Christiane. 1994. Quelques problèmes comparatifs de langues bantoues C10 des confins oubanguiens: le cas du mbati, du ngando et de l'aka. In Geider, Thomas and Kastenholz, Raimund (eds.), Sprachen und Sprachzeugnisse in Afrika: eine Sammlung philologischer Beiträge Wilhelm J.G. Möhlig zum 60. Geburtstag zugeeignet, 87-106. Köln: Cologne: Rüdiger Kö…
Aka CAR	Ngando (ngd)	ngan1304	Louis Périquet. 1915. Linguistique. (Rapport général sur la mission de délimitation Afrique-Équatoriale Française-Cameroun (1912-1913-1914), III.) Paris: Imprimérie Nationale. 106pp.
Babongo (Awandji-speaking)	Njebi	njeb1242	Guthrie, Malcolm. 1968. Notes on Nzɛbi (Gabon). Journal of African Languages 7. 101-129.
Babongo (Nzebi / Tsogho speaking)	Njebi / Tsogho	njeb1242 / tsog1243	Raponda Walker, André. 1996 [1937]. Eléments de grammaire ébongwé (langue des pygmées). Libreville: Fondation Mgr Raponda Walker. 36pp.
Babongo (Kanighi-speaking)	Kaningi	kani1279	Niama-Niama, Japhet. 2022. Approche historico-comparative des langues bantu du Gabon: vers de nouveaux embranchements phonologiques partagés entre les groupes B50-60-70. (Doctoral dissertation, Libreville: Université Omar Bongo; v+355pp.)
Baka, Cameroon	Baka	baka1272	Djoupee, Bertille. 2017. Description du ɓaka, une langue oubanguienne du Cameroun. (Doctoral dissertation, Paris: INALCO; xix+338pp.)
Baka, Cameroon	Baka	baka1272	Kilian-Hatz, Christa. 1995. Das Baka: Grundzüge einer Grammatik aus der Grammatikalisierungsperspektive. (Afrikanistische Monografien (AMO), 6.) Köln: Institut für Afrikanistik, Universität zu Köln. xviii+343pp.
Baka, Cameroon	Baka	baka1272	Rénaud, P. 1976. Description phonologique et éléments du morphologie nominale d'une langue Pygmée du Sud-Cameroun: les Bajex͡tepsilonle (Bipindi).
Bakola/ Bagyeli, Cameroon	Gyele (gyi)	gyel1242	Nadine Grimm. 2021. A Grammar of Gyeli. (Comprehensive Grammar Library, 2.) In Grimm, Nadine (ed.) Berlin: Language Science Press. xvi+701pp.
Bakoya, DRC	Koya	ngom1270	Medjo Mvé, Pither. 2011. Introduction à la langue et la culture des chasseurs-cueilleurs Bakoya (Région de Mékambo, Gabon) avec un petit dictionnaire. (Grammatische Analysen afrikanischer Sprachen, 40.) Cologne: Köppe. 220pp.
Bakoya, DRC	Koya	ngom1270	Soengas, Beatriz. 2010. La subsistance des Pygmées Bakoya à l'épreuve de l'agriculture: dynamique des savoirs ethnobotaniques et des pratiques (Département de la Zadié, Ogooué-Ivindo, Gabon). (Doctoral dissertation, Ecole Doctorale Sciences de la Nature et de l'Homme; 553pp.)
Bakoya, DRC	Koya	ngom1270	UNESCO/LUTO. 2006. Lexique du kóya: Langue des pygmées du Nord-Est du Gabon. Libreville: UNESCO. 136pp.
Batwa (West), DRC	Bushoong	bush1247	Hulstaert, Gustaaf. 1999. Éléments pour la dialectologie Mɔ́ngɔ. Annales Æquatoria 20. 9-322.
Batwa (Rwanda)	Twa (kin)	kiny1244	Kimenyi, Alexandre. 1976. A relational grammar of Kinyarwanda. (Doctoral dissertation, University of California at Los Angeles; xv+248pp.)
Bedzan, Cameroon	Tikar (tik)	tika1246	Stanley, Carol. 1991. Description morpho-syntaxique de la langue tikar: (parlée au Cameroun). Epinay: Epinay sur Seine: Société internationale de linguistique. 581pp. (Zugl.: Paris, Univ., Diss., 1986 u.d.T.: Stanley, Carol: Description phonologique et morpho-syntaxique de la langue tikar).
Efe, DRC	Efe	efee1239	Vorbichler, Anton. 1970/71. Erzählungen in der Mamvu-Sprache [pt. 8]. Afrika und Übersee 54. 109-134.
Sua, DRC	Bila	bila1255	Kutsch Lojenga, Connie [Constance]. 2003. Bila (D32). In Nurse, Derek and Philippson, Gérard (eds.), The Bantu languages, 450-474. London & New York: Routledge.
Other References used in S2_Shared_words:
Jacquot, A. 1983. Les classes nominales dans les langues bantoues des groupes B. 10, B. 20, B. 30 (Gabon-Congo) (Vol. 157). IRD Editions.
Marandola, F. 2014. Expressiveness in the performance of Bedzan Pygmies’ vocal polyphonies: when the same is never the same. Expressiveness in music performance: Empirical approaches across styles and cultures, 200-216.
Niama-Niama, Japhet. 2022. Approche historico-comparative des langues bantu du Gabon: vers de nouveaux embranchements phonologiques partagés entre les groupes B50-60-70. (Doctoral dissertation, Libreville: Université Omar Bongo; v+355pp.)
Raponda Walker, André. 1996. Eléments de grammaire ébongwé (langue des pygmées). Libreville: Fondation Mgr Raponda Walker. 36pp.
